1 **Quantifying the effects of the plant root on antibiotic production in the beneficial**  
2 **bacterium *B. subtilis***

3 Harsh Maan<sup>1</sup>, Omri Gilhar<sup>1</sup>, Ziv Porath<sup>2</sup> and Ilana Kolodkin-Gal<sup>1</sup>

4 <sup>1</sup> Department of Molecular Genetics, Weizmann Institute of Science, Rehovot, Israel

5 <sup>2</sup>

6 Corresponding author: [Ilana.kolodkin-gal@weizmann.ac.il](mailto:Ilana.kolodkin-gal@weizmann.ac.il)

7

8 **Abstract**

9 Beneficial and probiotic bacteria play an important role in conferring the immunity of their  
10 hosts against a wide range of bacterial, viral and fungal diseases. *B. subtilis* is a bacterium  
11 that protects the plant from various pathogens due to its capacity to produce an extensive  
12 repertoire of antibiotics. At the same time, the plant microbiome is a highly competitive  
13 niche, with multiple microbial species competing for space and resources, a competition  
14 that can be determined by the antagonistic potential of each microbiome member. Therefore,  
15 regulating antibiotic production in the rhizosphere is of great significance to eliminate  
16 pathogens and to establish beneficial host-associated communities.

17 In this work, we used *Bacillus subtilis* as a model to investigate the role of plant colonization in  
18 antibiotic production. Flow cytometry and Image-stream analysis supported the notion that *A.*  
19 *thaliana* specifically induced the transcription of the biosynthetic clusters for the non-  
20 ribosomal peptides surfactin, bacilysin and plipastatin and the polyketide bacillaene. Our  
21 results can be translated to improve the performance and competitiveness of beneficial  
22 members of the plant microbiome.

23

24

25

26

27

28

## 29 **Introduction**

30 Rhizobacteria can promote plant growth directly by colonization of the root and exert  
31 beneficial effects on plant growth and development (Kloepper et al., 2004a). These bacteria  
32 are often designated plant growth-promoting rhizobacteria (PGPR). To date, various PGPR  
33 have been isolated, including various *Bacillus* species, *Burkholderia cepacia* and  
34 *Pseudomonas fluorescens*. These beneficial rhizobacteria can also confer fitness on their  
35 hosts by activating their immune system, and by antagonizing plant pathogens (Berg et al.,  
36 2017; Berg and Raaijmakers, 2018; Allaband et al., 2019). In addition to the direct promotion  
37 of plant growth, PGPR enhance the efficiency of fertilizers, and aid in degrading xenobiotic  
38 compounds (Adam et al., 2016; Berg et al., 2017).

39 Among growth promoting strains and biocontrol agents, *Bacillus subtilis* and its related  
40 species, such as *B. amyloliquefaciens*, *B. velezensis* and *B. mojavensis* are considered  
41 model organisms (Fan et al., 2017). In particular, the antimicrobial activity of *B. subtilis* was so  
42 far demonstrated against bacterial, viral and fungal soil-borne plant pathogens (Kloepper et  
43 al., 2004b; Nagorska et al., 2007). This activity is mediated largely by antibiotic production:  
44 approximately 5% of the *B. subtilis* genome is dedicated to the synthesis of antimicrobial  
45 molecules by non-ribosomal peptide synthetases (NRPS) or polyketide synthases  
46 (PKS/NRPS) (Stein, 2005; Ongena and Jacques, 2008; Kinsella et al., 2009). *In vitro* and *in*  
47 *planta* studies indicated the importance of four antibiotics for plant protection: surfactin,  
48 bacilysin, plipastatin and bacillaene (Hou and Kolodkin-Gal, 2020; Arnaouteli et al., 2021).

49 Surfactin, is a small cyclic lipopeptide induced during the development of genetic competence  
50 (Magnuson et al., 1994). The machinery for surfactin synthesis is encoded within the *srfAA–*  
51 *AB–AC–AD* operon (Kluge et al., 1988). Surfactin is a powerful surfactant with antibacterial  
52 (Gonzalez et al., 2011) and antifungal properties (Falardeau et al., 2013).

53 Bacilysin is a non-ribosomal dipeptide composed of L-alanine and amino acid L-anticapsin,  
54 that demonstrates antibacterial activity against a wide range of pathogens (Rajavel *et al.*,  
55 2009). Its synthesis is controlled mainly by the *bac* operon (*bacABCDE*) and is regulated by  
56 other enzymes such as thymidylate synthase, homocysteine methyl transferase and the  
57 oligopeptide permeases (Inaoka et al., 2003).

58 Fengycin/plipastatin (Tsuge et al., 2007) is a highly effective lipopeptide comprising 10 amino  
59 synthesized by five fengycin synthetases (*ppsA*, *ppsB*, *ppsC*, *ppsD*, and *ppsE*).

60 Bacillaene and dihydrobacillaene (Butcher et al., 2007; Straight et al., 2007) are polyketides  
61 synthesized by an enzymatic complex encoded in the *pks* gene cluster (Butcher et al., 2007;  
62 Straight et al., 2007). This linear antimicrobial macrolides are synthesized by the PKSJLMNR  
63 cluster mega-complex (Straight et al., 2007).

64 Interestingly, we recently found that the plant host can enhance the efficiency of the killing of  
65 *Serratia plymuthica* by *B. subtilis* by inducing the synthesis of the antibiotic bacillaene (Ogran  
66 et al., 2019). These preliminary results raise the question on whether additional antibiotics  
67 that contribute to rhizocompatibility are induced by the plant to promote the colonization of  
68 preferred symbionts. To address this question, we considered the overall effect of the plant  
69 host in regulating four major antibiotics: surfactin, bacillaene, bacilysin and plipstatin, and an  
70 unrelated antibiotic resistance gene, the beta-lactamase PenP.

71 Our results indicate that the attachment with the root can specifically enhance antibiotic  
72 production (but not the  $\beta$ -lactamase PenP) and therefore affect the competitiveness of root-  
73 associated bacteria compared with their free-living counterparts.

74

## 75 **Results**

76 Using flow cytometry, we examined the expression of transcriptional reporters  $P_{srfAA}$ -yfp,  
77  $P_{pksC}$ -mKate,  $P_{bacA}$ -gfp and  $P_{ppsA}$ -gfp in static cultures. Specifically, we asked whether  
78 association with the plant would impact their expression. For this purpose, we compared  
79 bacteria cultured in liquid medium with bacteria attached to plant roots. The number of cells  
80 expressing each NRP and their respective mean intensity of fluorescence both increased for  
81 all these antibiotics' promoters. In addition, the mean intensity of cells expressing from the  
82 *pps* and *pks* operons also increased (Figure 1).

83 Conventional flow cytometry allows accurate high-throughput quantification of fluorescence  
84 intensities, however it is less accurate for bacterial analysis. Higher fluorescence levels may  
85 be interpreted as higher expression levels, but also can result from larger bacterial size or  
86 small aggregates. Therefore, to increase our resolution into the manner by which antibiotic  
87 promoters respond to the attachment of the root we used Imaging Flow Cytometer. By  
88 collecting large numbers of digital images per sample and providing a numerical  
89 representation of image-based features, the ImageStreamX Mk II combines the per cell

90 information content provided by standard microscopy with the statistical significance afforded  
91 by large sample sizes common to standard flow cytometry.

92 This allowed us to exclude most of the bacterial doublets or small aggregates, and calculate  
93 more accurately both the % of positive GFP cells, as well as bacterial cell length and GFP  
94 intensity normalized for cell size. This detailed analysis of antibiotic reporters demonstrated  
95 that in addition to the % of positive GFP cells for surfactin promoter, the distribution of GFP  
96 intensity in the population also changes (Figure 2). These effects were also observed for the  
97 transcription from the *bac*, (Figure 3), *pps* (Figure 4) and *pks* promoter (Figure 5). The impact  
98 of the plant on cell length was not robust, as it was not detected in all image-stream  
99 experiments (Figures 2-5). However, there were experimental sets where the plant  
100 significantly affected cell shape and reduced the length of *B. subtilis* cells (Figures 4 and 5).

101 To confirm that the impact of the plant root on antibiotic production could be due to a secreted  
102 we monitored the expression from  $P_{srfAA}$  and  $P_{pksC}$  fused to a luciferase reporter in the  
103 presence and absence of root secretions. The use of the unstable luciferase (an enzyme  
104 which degrades rapidly and therefore not accumulated (McLoon et al., 2011a) as a reporter  
105 allows us to monitor gene expression in real time by monitoring light production in a plate  
106 reader with an illuminometer. When grown on liquid defined medium, wild-type cells  
107 expressed luciferase from *srfAA* and *pksC* promoters robustly. However, while root secretions  
108 did not alter the kinetic of the expression, they were sufficient to significantly increase the  
109 intensity of the luciferase emission (Figure 6). These results suggest that the plant may secrete  
110 metabolite that regulate the production of surfactin and bacillaene. Consistently, using  
111 confocal scanning laser microscopy, we could clearly confirm the expression of the *pks*  
112 promoter and on some extent, surfactin on cells attached with *A. thaliana* roots (Figure 7).

113  $\beta$ -lactamases are enzymes which account for an additional layer of defence as they  
114 hydrolyse the  $\beta$ -lactam ring of  $\beta$ -lactams, thus inactivating the antibiotic before it reaches its  
115 target, the PBPs (Therrien and Levesque, 2000). Consistent with a hypothesis that the plant  
116 and its secretions specifically regulate antibiotic production, the expression of the unrelated  
117 PenP promoter was not induced but rather slightly decreased in the presence of the plant  
118 (Figure 8).

119

## 120 Discussion

121 Since *B. subtilis* was first described by Ferdinand Cohn in the late 1800s, it was shown to  
122 specialize in the production of metabolites (McLoon et al., 2011b). Many of the biosynthetic  
123 pathways for these metabolites are conserved either across the entire *Bacillus* genus or  
124 within specific phylogenetic clades. Fengycin, bacillaene, bacilysin and surfactin were  
125 essentially observed within the *B. subtilis* group (Hou and Kolodkin-Gal, 2020). This suggests  
126 that the different environmental niches inhabited by members of the *B. subtilis* clade may  
127 select for conservation of metabolites with distinct (or potentially redundant) beneficial  
128 functions.

129 Here, we found that the production of non-ribosomal peptides and polyketides was specifically  
130 activated during symbiotic interaction with *A. thaliana*. Our results demonstrated that both the  
131 root and its secretions increased the expression of four different biosynthetic clusters  
132 encoding for antibiotics with significance for *B. subtilis* competitiveness. In contrast, the PenP  
133  $\beta$ -lactamase which deactivate  $\beta$ -lactam antibiotic was not induced by the host. This result is  
134 intriguing as the production of this enzyme promotes increased resistance of the bacterium in  
135 the competitive soil environment, containing  $\beta$ -lactam producers (Hou and Kolodkin-Gal,  
136 2020), but does not contribute directly to the fitness of the plant. In contrast, each of the  
137 induced antibiotics were shown to grant protection to the plant host versus fungal and  
138 bacterial pathogens.

139 Interestingly, we previously demonstrated that the interaction with the plant increases the  
140 capacity of *B. subtilis* to compete with *Serratia Plymuthica*, and our current results further  
141 indicate that the root is active regulator of the competitive interactions occurring on its roots  
142 (Ogran et al., 2019). The complexity of these antibiotic-host interactions suggests that *B.*  
143 *subtilis* biofilms can be considered a part of the plant microbiome, with the host actively  
144 promoting the establishment of the most beneficial bacterial community. Our findings provide  
145 a simple example of high-order interactions that shape microbiomes; the host modulates  
146 antibiotic production in the desired bacterial colonizers, providing the colonizers a clear  
147 advantage over less beneficial potential residents.

148

## 149 **Materials and Methods**

### 150 Strains and media

151 All strains used in this study are in Table S1. The strains were grown in LB broth (Difco), or  
152 MSgg medium (Branda et al., 2001) (5 mM potassium phosphate, 100 mM MOPS (pH 7), 2  
153 mM MgCl<sub>2</sub>, 50 μM MnCl<sub>2</sub>, 50 μM FeCl<sub>3</sub>, 700 μM CaCl<sub>2</sub>, 1 μM ZnCl<sub>2</sub>, 2 μM thiamine, 0.5%  
154 glycerol, 0.5% glutamate, 50 μg/mL threonine, tryptophan and phenylalanine) (Branda et al.,  
155 2001). Solid LB medium contained 1.5% bacto agar (Difco).

156

### 157 Plant Growth Conditions

158 Seeds of *A. thaliana* Col-0 were surface-sterilized and seeded on petri dishes containing  
159 Murashige and Skoog medium (4.4 g/L), PH 5.7, supplied with 0.5% (w/v) plant agar  
160 (Duchefa), 0.5% Sucrose (SigmaAldrich) and then stratified at 4°C for 2 days. The seeds  
161 were further transferred to a growth chamber (MRC) at 23°C in 12 h light/12 h dark regime.

162

### 163 Extraction of plant secretions

164 Plant secretions were retrieved from 14-day-old *A. thaliana* seedlings cultured in 6 ml liquid  
165 MSgg of each well of a 6-well microplate (Thermo Scientific). 8 seedlings were put in each  
166 well. The plant secretions were collected after four days and filtered with a 0.22 μm filter, and  
167 stored at 4°C for further use

168

### 169 Luminescence experiments

170 Luminescence reporters were grown in either MSgg medium or MSgg medium containing  
171 plant secretions. Experiments were carried using a 96 – well plate flat bottom with white  
172 opaque walls (Corning). Measurements were performed every 30 min at 30 °C for a period for  
173 24h, using a microplate reader (Synergy 2; BioTek, Winooski, VT, USA). Luciferase activity  
174 was normalized to avoid artefacts related to differential cells numbers as RLU/OD.

175

### 176 Confocal microscopy

177 Plants cultured with bacteria were washed in PBS and mounted on a microscope slide and  
178 covered with a poly-L-Lysine 31 (Sigma)-treated coverslip. Cells were visualized and  
179 photographed using a laser scanning confocal microscope (Zeiss LSM 780) equipped with a

180 high resolution microscopy Axiocam camera, as required. Data were captured using Zen  
181 black software (Zeiss, Oberkochenm, Germany).

### 182 Flow Cytometer Cell Sorting

183 Indicated strains used in the experiments were inoculated at an OD of 0.02 in 1.5 ml liquid  
184 MSgg without seedlings (control) and MSgg with 14-d-old *A. thaliana* seedlings in a 24-well  
185 plate (Thermo Scientific), each well contained four seedling. the set was incubated for 24h in  
186 growth chamber (MRC) at 23°C in 12 h light/12 h dark regime. After incubation the seedlings  
187 were removed from the liquid medium, washed in PBS and transferred to a 1.5 eppendorf  
188 tube in 1 ml of PBS and vortexed for 1 minute, for the purpose of detaching the bacteria from  
189 the root. Samples was measured using a BD LSR II flow cytometer (BD Biosciences), using  
190 laser excitation of 488 nm, coupled with 505 LP and 525/50 sequential filters.. 100,000 cells  
191 were counted and samples were analyzed usingFACS Diva (BD Biosciences).

192

### 193 Imaging Flow Cytometry

194 Samples were prepared as for the sorting flow cytometer. Data was acquired by  
195 ImageStream X mark II (Luminx corp., Austin Tx) using a 60X lense (NA=0.9). Lasers used  
196 were 488nm (200mW) for GFP excitation and 785nm (5mW) for side scatter measurement.  
197 During acquisition bacterial cells were gated according to their area (in square microns) and  
198 side scatter, which excluded the calilbration beads (that run in the instrument along with the  
199 sample). For each sample 100,000 events were collected. Data was analysed using IDEAS  
200 6.3. Single event bacteria were selected according to their area (in square microns) and  
201 aspect ratio (width divided by the length of a best-fit ellipse).

202

### 203 **Statistical analysis**

204 All experiments were performed three separate and independent times in triplicates, unless  
205 stated otherwise. Statistical analyses were performed with GraphPad Prism 9.0 (GraphPad  
206 Software, Inc., San Diego, CA).

207



208 **Acknowledgments:** The Kolodkin–Gal laboratory is supported by the Israel Science  
209 Foundation grant number 119/16 and ISF-JSPS 184/20 and Israel Ministry of Science -  
210 Tashtiot (Infrastructures) - 123402 in Life Sciences and Biomedical Sciences. IKG is  
211 supported by an internal grant from the Estate of Albert Engleman provided by the Angel–  
212 Faivovich Fund for Ecological Research, and by a research grant from the Benozio  
213 Endowment Fund for the Advancement of Science. IKG is a recipient of the Rowland and  
214 Sylvia Career Development Chair.

215

216

217

218

219

220

221

222

223

224

225

226

227

228

229

230

231

232

233



234

235

236

237

238 **Table S1**

| Strain                   | Description                                                                                                                                                                               | Source or reference            |
|--------------------------|-------------------------------------------------------------------------------------------------------------------------------------------------------------------------------------------|--------------------------------|
| <i>B. subtilis</i>       | Wild type                                                                                                                                                                                 | (Branda et al., 2001)          |
| $P_{pksC}$ - <i>lux</i>  | <i>B. subtilis</i> <i>sacA</i> :: $P_{pksC}$ - <i>lux</i> (Cm <sup>r</sup> ), promoter of bacillaene operon tagged to the luciferase reporter integrated in the neutral <i>SacA</i> locus | (Ogran et al., 2019)           |
| $P_{srfAA}$ - <i>lux</i> | <i>B. subtilis</i> <i>sacA</i> :: $P_{srfAA}$ - <i>lux</i> (Cm <sup>r</sup> ), promoter of surfactin operon tagged to the luciferase reporter integrated in the neutral <i>sacA</i> locus | (Maan et al., 2021)            |
| $P_{srfAA}$ - <i>yfp</i> | <i>B. subtilis</i> <i>sacA</i> :: $P_{srfAA}$ - <i>yfp</i> (Sp <sup>r</sup> ), promoter of surfactin operon tagged to the YFP reporter integrated in the neutral <i>amyE</i> locus        | Avigdor Eldar Lab, TAU, Israel |
| $P_{pksC}$ - <i>gfp</i>  | <i>B. subtilis</i> <i>amyE</i> :: $P_{srfAA}$ - <i>yfp</i> (Cm <sup>r</sup> ), promoter of bacillaene operon tagged to the GFP reporter integrated in the neutral <i>amyE</i> locus       | (Ogran et al., 2019)           |
| $P_{bacA}$ - <i>gfp</i>  | <i>B. subtilis</i> <i>amyE</i> :: $P_{bacA}$ - <i>gfp</i> (Cm <sup>r</sup> ), promoter of bacilysin operon tagged to the GFP reporter integrated in the neutral <i>amyE</i> locus         | (Maan et al., 2021)            |
| $P_{ppsA}$ - <i>gfp</i>  | <i>B. subtilis</i> <i>amyE</i> :: $P_{ppsA}$ - <i>gfp</i> (Cm <sup>r</sup> ), promoter of plipstatin operon tagged to the GFP reporter integrated in the neutral <i>amyE</i> locus        | (Maan et al., 2021)            |
| $P_{penP}$ - <i>gfp</i>  | <i>B. subtilis</i> <i>amyE</i> :: $P_{penP}$ - <i>gfp</i> (Sp <sup>r</sup> ), promoter of plipstatin operon tagged to the GFP reporter integrated in the neutral <i>amyE</i> locus        | (Bucher et al., 2019)          |

239

240 **Cm<sup>r</sup>** – chloramphenicol resistance, **Sp<sup>r</sup>** – spectinomycin resistance

241

242

243

244 **References:**

- 245 Adam, E., Groenenboom, A.E., Kurm, V., Rajewska, M., Schmidt, R., Tyc, O. et al. (2016) Controlling  
246 the Microbiome: Microhabitat Adjustments for Successful Biocontrol Strategies in Soil and Human  
247 Gut. *Front Microbiol* **7**: 1079.
- 248 Allaband, C., McDonald, D., Vazquez-Baeza, Y., Minich, J.J., Tripathi, A., Brenner, D.A. et al. (2019)  
249 Microbiome 101: Studying, Analyzing, and Interpreting Gut Microbiome Data for Clinicians. *Clin*  
250 *Gastroenterol Hepatol* **17**: 218-230.
- 251 Arnaouteli, S., Bamford, N.C., Stanley-Wall, N.R., and Kovacs, A.T. (2021) *Bacillus subtilis* biofilm  
252 formation and social interactions. *Nat Rev Microbiol*.
- 253 Berg, G., and Raaijmakers, J.M. (2018) Saving seed microbiomes. *ISME J* **12**: 1167-1170.
- 254 Berg, G., Koberl, M., Rybakova, D., Muller, H., Grosch, R., and Smalla, K. (2017) Plant microbial  
255 diversity is suggested as the key to future biocontrol and health trends. *FEMS Microbiol Ecol* **93**.
- 256 Branda, S.S., Gonzalez-Pastor, J.E., Ben-Yehuda, S., Losick, R., and Kolter, R. (2001) Fruiting body  
257 formation by *Bacillus subtilis*. *Proc Natl Acad Sci U S A* **98**: 11621-11626.
- 258 Bucher, T., Keren-Paz, A., Hausser, J., Olender, T., Cytryn, E., and Kolodkin-Gal, I. (2019) An active  
259 beta-lactamase is a part of an orchestrated cell wall stress resistance network of *Bacillus subtilis* and  
260 related rhizosphere species. *Environ Microbiol*.
- 261 Butcher, R.A., Schroeder, F.C., Fischbach, M.A., Straight, P.D., Kolter, R., Walsh, C.T., and Clardy, J.  
262 (2007) The identification of bacillaene, the product of the PksX megacomplex in *Bacillus subtilis*. *Proc*  
263 *Natl Acad Sci U S A* **104**: 1506-1509.
- 264 Falardeau, J., Wise, C., Novitsky, L., and Avis, T.J. (2013) Ecological and mechanistic insights into the  
265 direct and indirect antimicrobial properties of *Bacillus subtilis* lipopeptides on plant pathogens. *Journal*  
266 *of chemical ecology* **39**: 869-878.
- 267 Fan, B., Blom, J., Klenk, H.P., and Borriss, R. (2017) *Bacillus amyloliquefaciens*, *Bacillus velezensis*,  
268 and *Bacillus siamensis* Form an "Operational Group B. amyloliquefaciens" within the B-subtilis  
269 Species Complex. *Frontiers in Microbiology* **8**.
- 270 Gonzalez, D.J., Haste, N.M., Hollands, A., Fleming, T.C., Hamby, M., Pogliano, K. et al. (2011)  
271 Microbial competition between *Bacillus subtilis* and *Staphylococcus aureus* monitored by imaging  
272 mass spectrometry. *Microbiology* **157**: 2485-2492.
- 273 Hou, Q., and Kolodkin-Gal, I. (2020) Harvesting the complex pathways of antibiotic production and  
274 resistance of soil bacilli for optimizing plant microbiome. *FEMS Microbiol Ecol*.
- 275 Inaoka, T., Takahashi, K., Ohnishi-Kameyama, M., Yoshida, M., and Ochi, K. (2003) Guanine  
276 nucleotides guanosine 5'-diphosphate 3'-diphosphate and GTP co-operatively regulate the production of  
277 an antibiotic bacilysin in *Bacillus subtilis*. *J Biol Chem* **278**: 2169-2176.
- 278 Kinsella, K., Schulthess, C.P., Morris, T.F., and Stuart, J.D. (2009) Rapid quantification of *Bacillus*  
279 *subtilis* antibiotics in the rhizosphere. *Soil Biology and Biochemistry* **41**: 374-379.
- 280 Kloepper, J.W., Ryu, C.M., and Zhang, S. (2004a) Induced Systemic Resistance and Promotion of  
281 Plant Growth by *Bacillus* spp. *Phytopathology* **94**: 1259-1266.
- 282 Kloepper, J.W., Ryu, C.M., and Zhang, S. (2004b) Induced Systemic Resistance and Promotion of  
283 Plant Growth by *Bacillus* spp. *Phytopathology* **94**: 1259-1266.

- 284 Kluge, B., Vater, J., Salnikow, J., and Eckart, K. (1988) Studies on the Biosynthesis of Surfactin, a  
285 Lipopeptide Antibiotic from *Bacillus-Subtilis* Atcc-21332. *Febs Letters* **231**: 107-110.
- 286 Maan, H., Friedman, J., and Kolodkin-Gal, I. (2021) Resolving the conflict between antibiotic  
287 production and rapid growth by recognition of peptidoglycan of susceptible competitors. *bioRxiv*:  
288 2021.2002.2007.430110.
- 289 Magnuson, R., Solomon, J., and Grossman, A.D. (1994) Biochemical and genetic characterization of a  
290 competence pheromone from *B. subtilis*. *Cell* **77**: 207-216.
- 291 McLoon, A.L., Kolodkin-Gal, I., Rubinstein, S.M., Kolter, R., and Losick, R. (2011a) Spatial  
292 regulation of histidine kinases governing biofilm formation in *Bacillus subtilis*. *J Bacteriol* **193**: 679-  
293 685.
- 294 McLoon, A.L., Guttenplan, S.B., Kearns, D.B., Kolter, R., and Losick, R. (2011b) Tracing the  
295 domestication of a biofilm-forming bacterium. *J Bacteriol* **193**: 2027-2034.
- 296 Nagorska, K., Bikowski, M., and Obuchowski, M. (2007) Multicellular behaviour and production of a  
297 wide variety of toxic substances support usage of *Bacillus subtilis* as a powerful biocontrol agent. *Acta*  
298 *Biochim Pol* **54**: 495-508.
- 299 Ogran, A., Yardeni, E.H., Keren-Paz, A., Bucher, T., Jain, R., Gilhar, O., and Kolodkin-Gal, I. (2019)  
300 The plant host induces antibiotic production to select the most beneficial colonizers. *Appl Environ*  
301 *Microbiol*.
- 302 Ongena, M., and Jacques, P. (2008) *Bacillus* lipopeptides: versatile weapons for plant disease  
303 biocontrol. *Trends Microbiol* **16**: 115-125.
- 304 Stein, T. (2005) *Bacillus subtilis* antibiotics: structures, syntheses and specific functions. *Molecular*  
305 *Microbiology* **56**: 845–857
- 306 Straight, P.D., Fischbach, M.A., Walsh, C.T., Rudner, D.Z., and Kolter, R. (2007) A singular  
307 enzymatic megacomplex from *Bacillus subtilis*. *Proc Natl Acad Sci U S A* **104**: 305-310.
- 308 Therrien, C., and Levesque, R.C. (2000) Molecular basis of antibiotic resistance and beta-lactamase  
309 inhibition by mechanism-based inactivators: perspectives and future directions. *FEMS Microbiol Rev*  
310 **24**: 251-262.
- 311 Tsuge, K., Matsui, K., and Itaya, M. (2007) Production of the non-ribosomal peptide plipastatin in  
312 *Bacillus subtilis* regulated by three relevant gene blocks assembled in a single movable DNA segment.  
313 *J Biotechnol* **129**: 592-603.

314

315

316

317

318

319

320

321

322

323

324

325

326

327 **Figure Legends:**

328 Figure 1:

329 Indicated reporter strains for  $P_{srfAA}$ -gfp (surfactin),  $P_{pkcC}$ -gfp (bacillaene),  $P_{bacA}$ -gfp (bacilysin)  
330 and  $P_{ppsA}$ -gfp (plipastatin), were analysed by flow cytometry for (A) positively expressing  
331 fluorescent populations or (B) the mean intensity of the fluorescent populations. Reporter  
332 stains were either grown in MSgg medium or in MSgg medium in presence of *A. thaliana*  
333 seedlings. Data were collected from 24 h post inoculation, 100,000 cells were counted.  
334 Graphs represent results from three independent experiments with  $n = 3$ /experiment (total  $n =$   
335  $9$ /group). Statistical analysis was performed using Two-way ANOVA followed by Tukey's  
336 multiple comparison post hoc testing.  $P < 0.05$  was considered statistically significant.

337

338 Figure 2:

339 The expression of  $P_{srfAA}$ -gfp (surfactin) attached to plant roots versus cultured in liquid MSgg.  
340 Bacteria expressing GFP under the control of the *srf* promoter were cultured in the absence  
341 or presence of *A. thaliana* seedlings. After 24h, bacteria colonizing the roots and bacteria  
342 cultured in liquid MSgg alone were collected. The percent of GFP expressing cells (**A**), cell  
343 length (**B**) and mean fluorescence intensity of the cells (**C**) were measured by Imaging Flow  
344 Cytometry and analyzed with IDEAS 6.3. (**D**) Representative bright field and fluorescent  
345 images related to expression of GFP in MSgg and on *A. thaliana* roots. Scale bar = 7  $\mu\text{m}$ .  
346 Data were collected from 24 h post inoculation, 100,000 cells were counted. Graphs  
347 represent results from three independent experiments with  $n = 3$ /experiment (total  $n =$   
348  $9$ /group). Statistical analysis was performed using unpaired t-test with Welch correction.  $P <$   
349  $0.05$  was considered statistically significant.

350

351 Figure 3:

352 The expression of  $P_{pksC}$ -gfp (bacillaene) attached to plant roots versus cultured in liquid  
353 MSgg. Bacteria expressing GFP under the control of the *pks* promoter were cultured in the  
354 absence or presence of *A. thaliana* seedlings. After 24h, bacteria colonizing the roots and  
355 bacteria cultured in liquid MSgg alone were collected. The percent of GFP expressing cells  
356 (A), cell length (B) and mean fluorescence intensity of the cells (C) were measured by  
357 Imaging Flow Cytometry and analyzed with IDEAS 6.3. (D) Representative brightfield and  
358 fluorescent images related to expression of GFP in MSgg and on *A. thaliana* roots. Scale bar  
359 = 7  $\mu$ m. Data were collected from 24 h post inoculation, 100,000 cells were counted. Graphs  
360 represent results from three independent experiments with  $n = 3$ /experiment (total  $n =$   
361 9/group). Statistical analysis was performed using unpaired t-test with Welch correction.  $P <$   
362 0.05 was considered statistically significant.

363

364 Figure 4:

365 The expression of  $P_{bacA}$ -gfp (bacilysin) attached to plant roots versus cultured in liquid MSgg.  
366 Bacteria expressing GFP under the control of the *bac* promoter were cultured in the absence  
367 or presence of *A. thaliana* seedlings. After 24h, bacteria colonizing the roots and bacteria  
368 cultured in liquid MSgg alone were collected. The percent of GFP expressing cells (A), cell  
369 length (B) and mean fluorescence intensity of the cells (C) were measured by Imaging Flow  
370 Cytometry and analyzed with IDEAS 6.3 (D) Representative brightfield and fluorescent  
371 images related to expression of GFP in MSgg and on *A. thaliana* roots. Scale bar = 7  $\mu$ m.  
372 Data were collected from 24 h post inoculation, 100,000 cells were counted. Graphs  
373 represent results from three independent experiments with  $n = 3$ /experiment (total  $n =$   
374 9/group). Statistical analysis was performed using unpaired t-test with Welch correction.  $P <$   
375 0.05 was considered statistically significant.

376

377 Figure 5:

378 The expression of  $P_{ppsA}$ -gfp (plipastatin) in bacteria attached to plant roots versus cultured in  
379 liquid MSgg. Bacteria expressing GFP under the control of the *pps* promoter were cultured in  
380 the absence or presence of *A. thaliana* seedlings. After 24h, bacteria colonizing the roots and  
381 bacteria cultured in liquid MSgg alone were collected. The percent of GFP expressing cells  
382 (A), cell length (B) and mean fluorescence intensity of the cells (C) were measured by

383 Imaging Flow Cytometry and analyzed with IDEAS 6.3. (D) Representative brightfield and  
384 fluorescent images related to expression of GFP in MSgg and on *A. thaliana* roots. Scale bar  
385 = 7  $\mu$ m. Data were collected from 24 h post inoculation, 100,000 cells were counted. Graphs  
386 represent results from three independent experiments with  $n = 3/\text{experiment}$  (total  $n =$   
387  $9/\text{group}$ ). Statistical analysis was performed using unpaired t-test with Welch correction.  $P <$   
388 0.05 was considered statistically significant.

389

390 Figure 6:

391 *A. thaliana* secretions increase the expression of (A)  $P_{srfAA}\text{-lux}$  (surfactin) and (B)  $P_{pksC}\text{-}$   
392  $\text{lux}$  (bacillane) in *B. subtilis* cells. Bacteria expressing luciferase under the control of the *srf*  
393 and *pks* promoters were cultured in *A. thaliana* secretions or in liquid MSgg and grown in a  
394 microplate reader for 24h. Graphs represent results from three independent experiments.  
395 Error bars represent  $\pm$  SEM.

396

397 Figure 7:

398 The expression of  $P_{pksC}\text{-gfp}$  (bacillaene) and  $P_{srfAA}\text{-gfp}$  (surfactin) on *A. thaliana* roots.  
399 Bacteria expressing GFP under the control of the *pks* and *srf* promoters were cultured in the  
400 presence of *A. thaliana* seedlings in MSgg medium. After 24h, the bacteria colonizing the  
401 roots were photographed with confocal microscope.

402

Figure 1

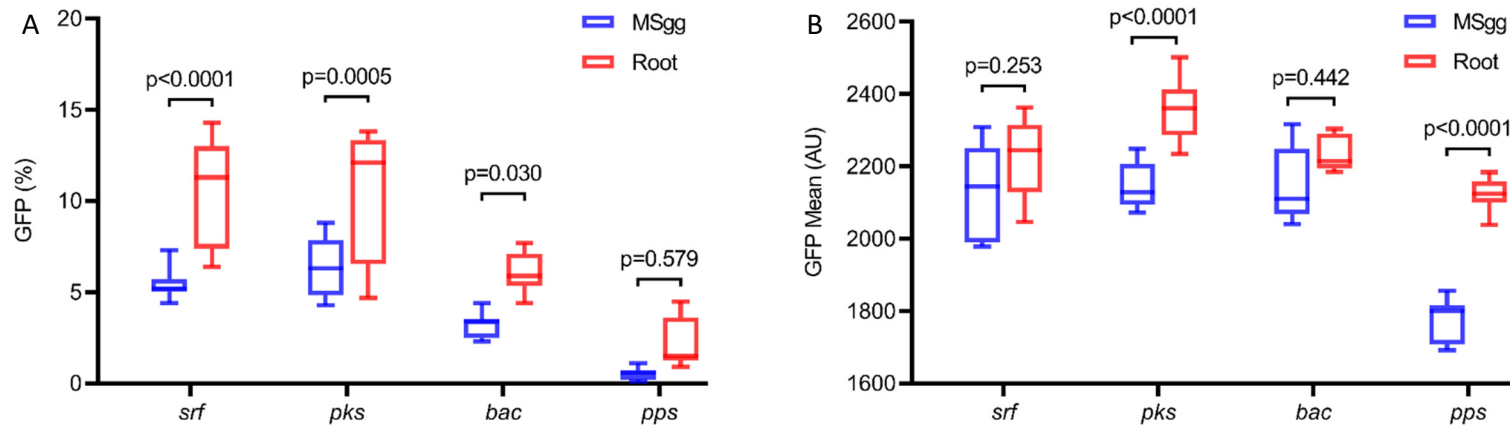



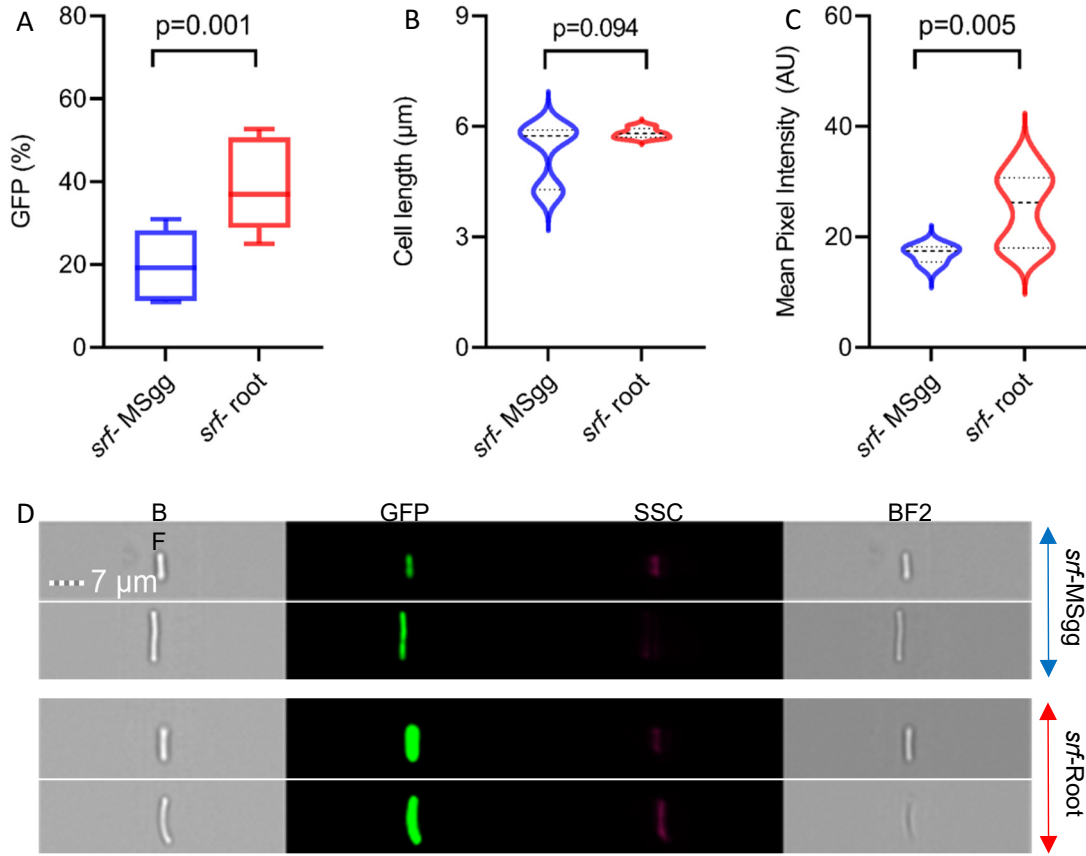

Figure 2

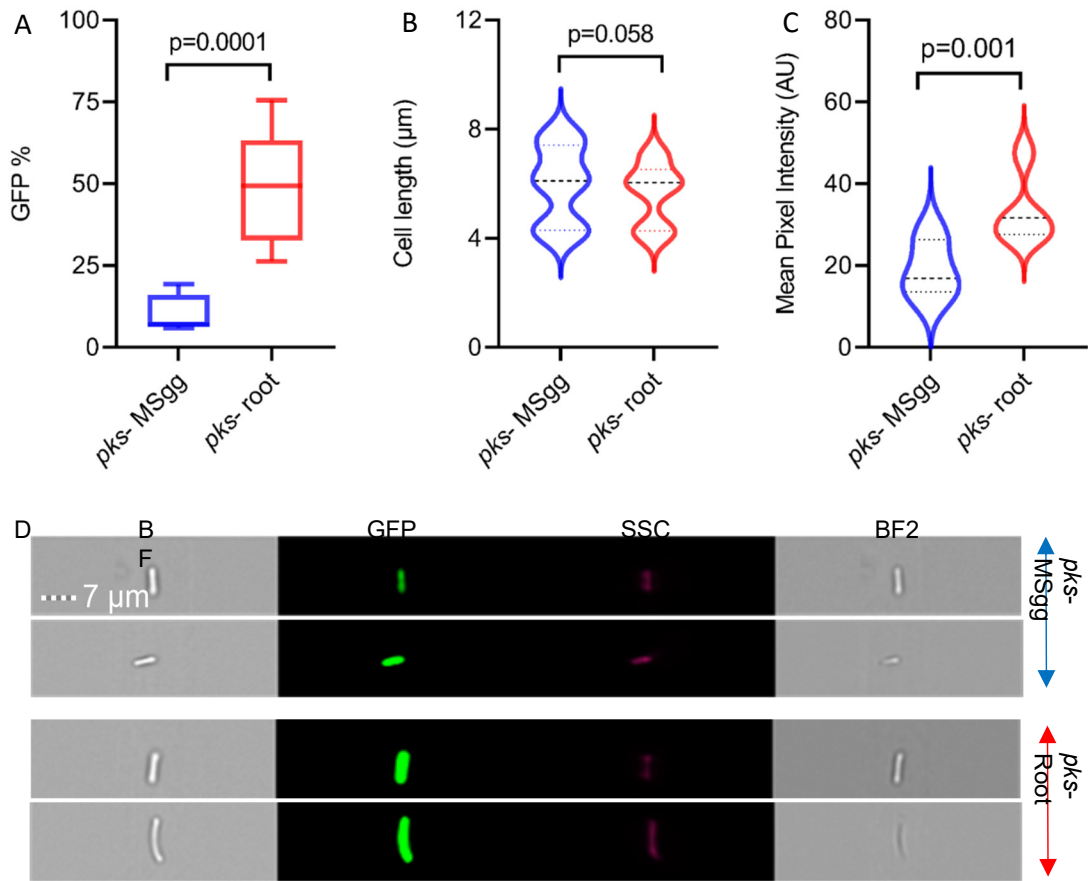

Figure 3

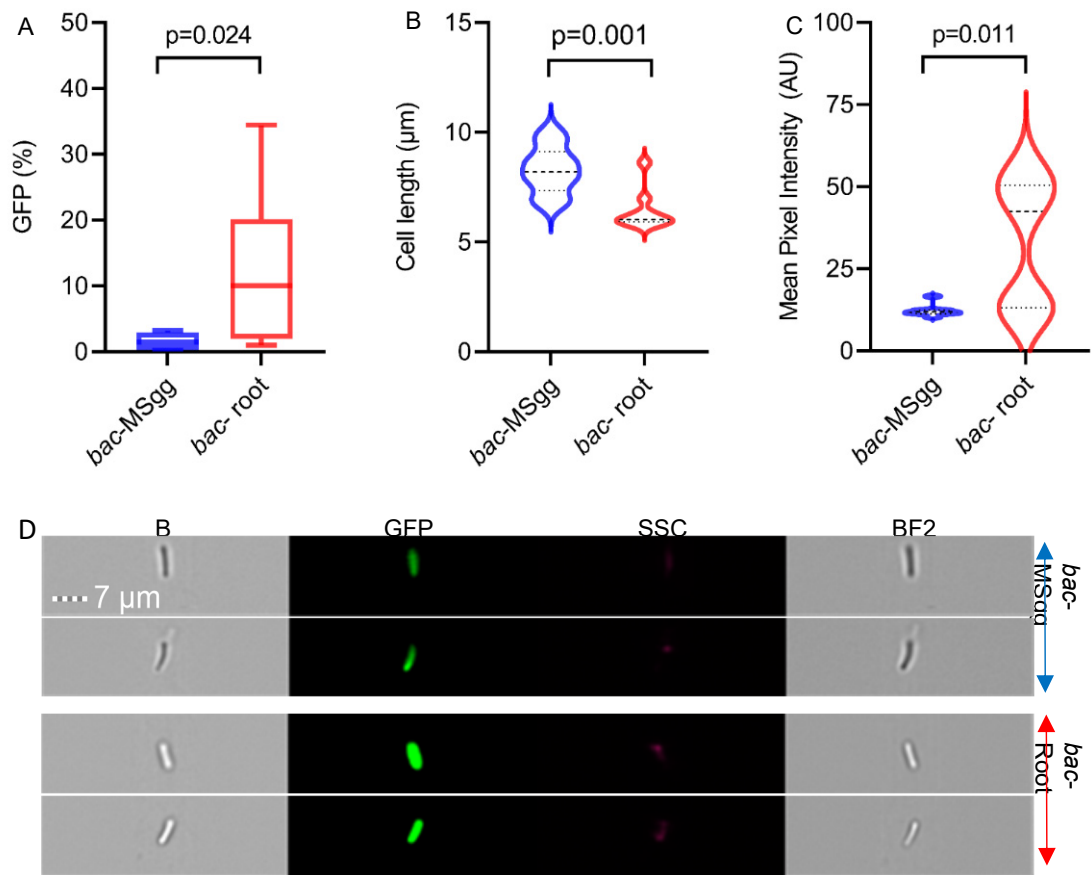

Figure 4

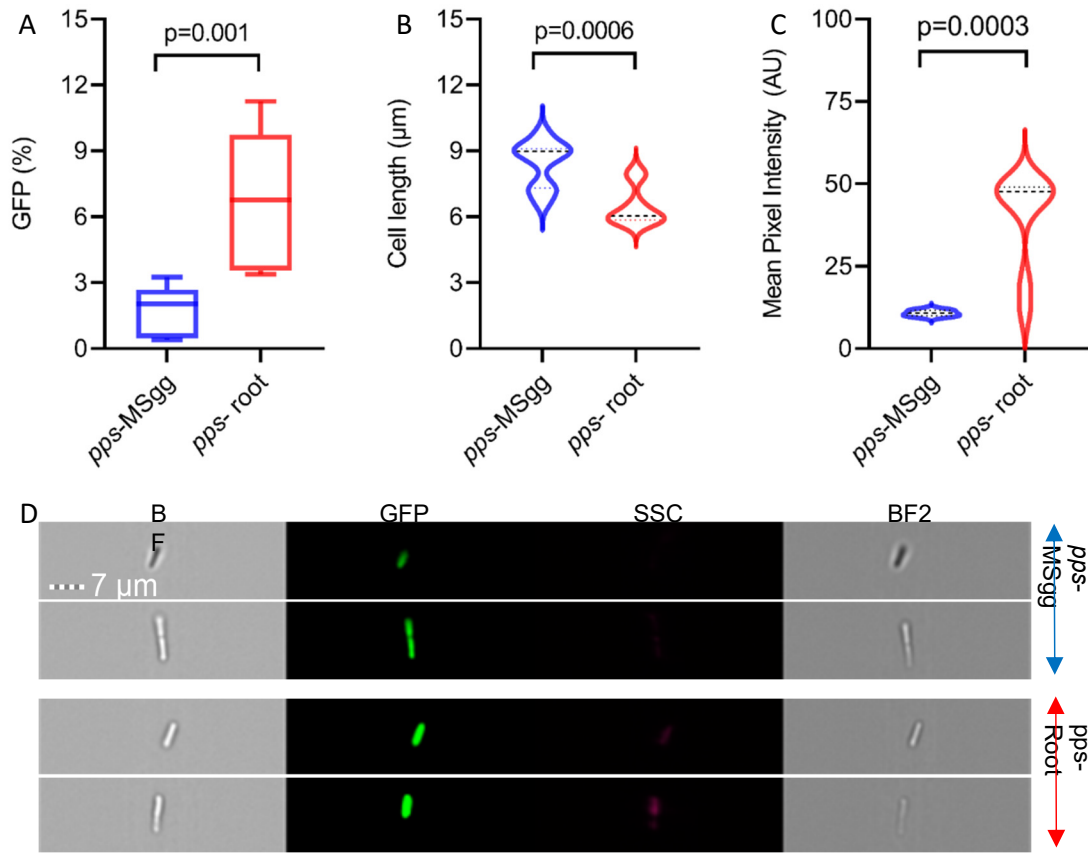

Figure 5

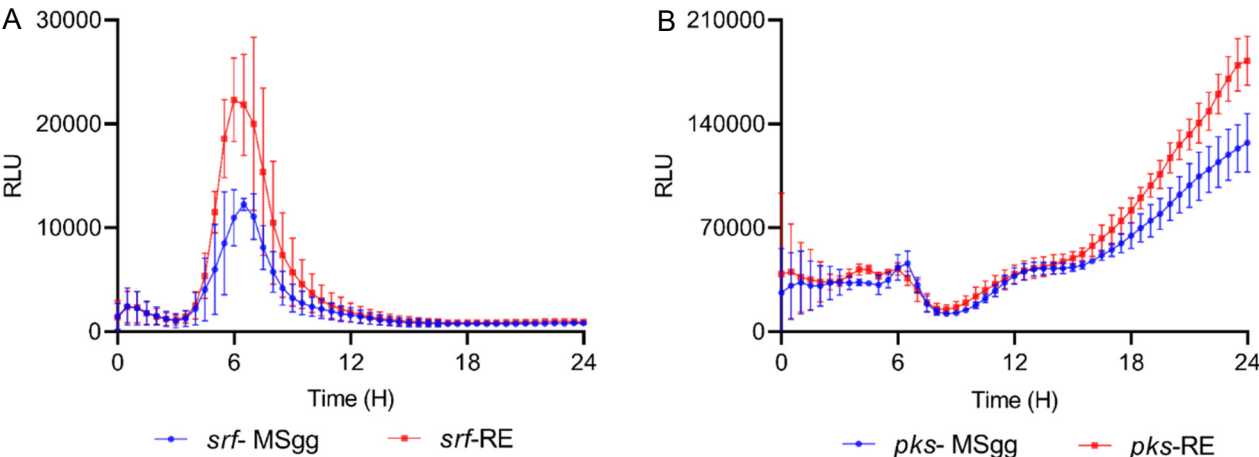

Figure 6

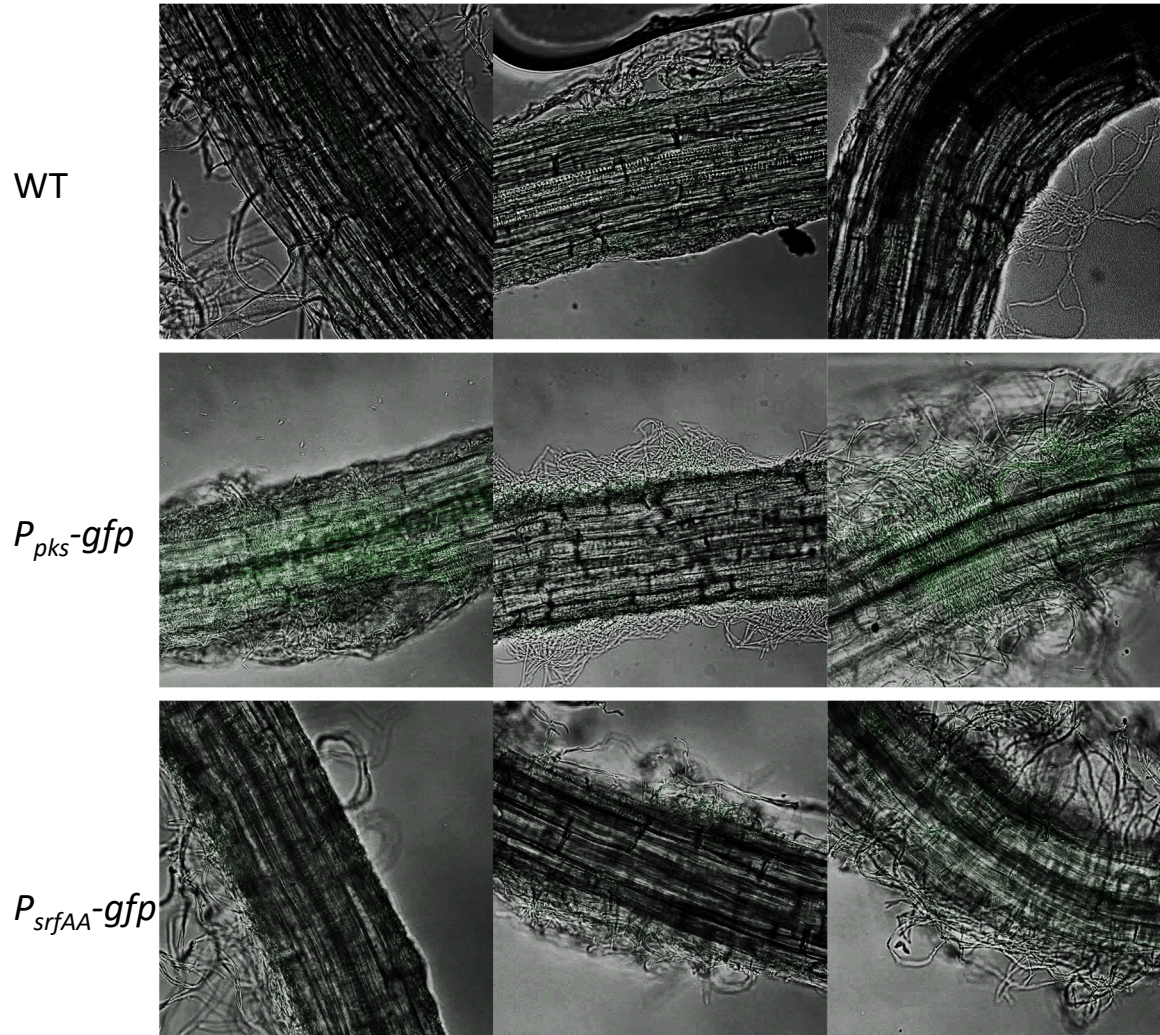

Figure 7

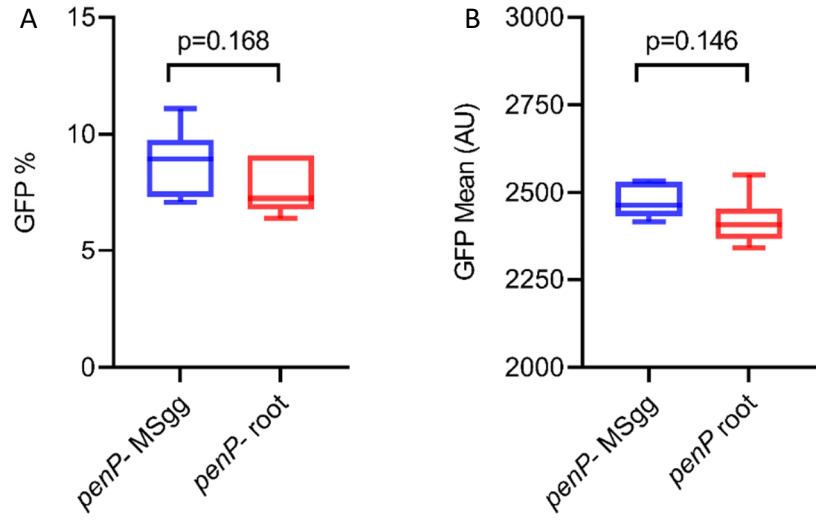

Figure 8
